# Supplementary material for: Synthesis, characterization, and optimization of a quaternary nanocomposite for efficient electromagnetic absorption coating in the X-band
Source: publisher site journal article supplement (doi:10.1515/ijmr-2021-8516), 2023-06-30
Supplement: Supplementary file 1 [file j_ijmr-2021-8516_suppl_001.docx]

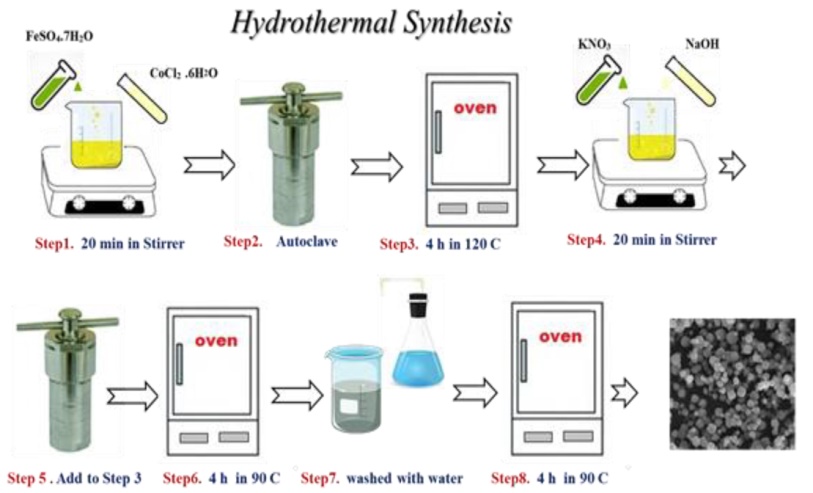


Fig. s1-1. The preparation of the CF flowchart with hydrothermal synthesis method
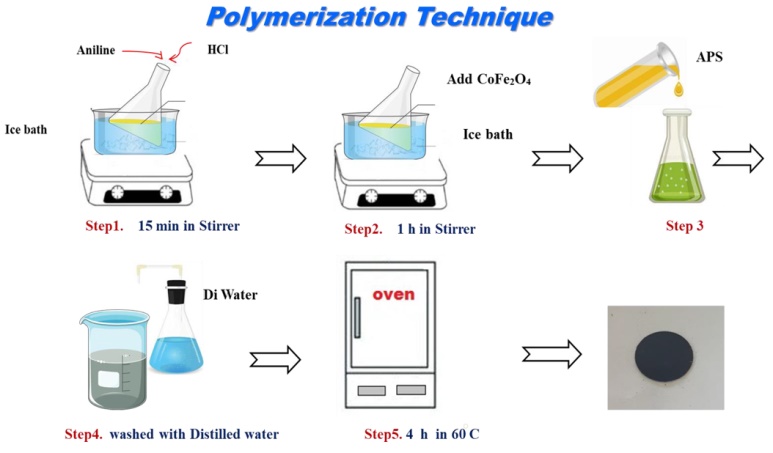


Fig. s1-2. The preparation of the CF/ PANI flowchart with polymerization technique


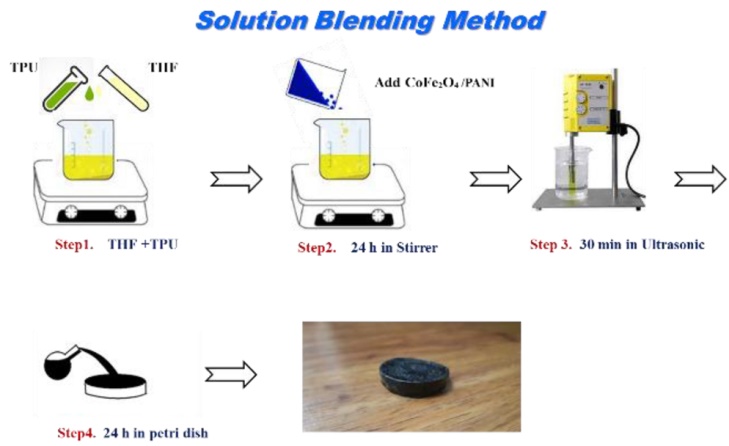


Fig. s1-3. The preparation of the CF/ PANI/ TPU flowchart with solution belending method


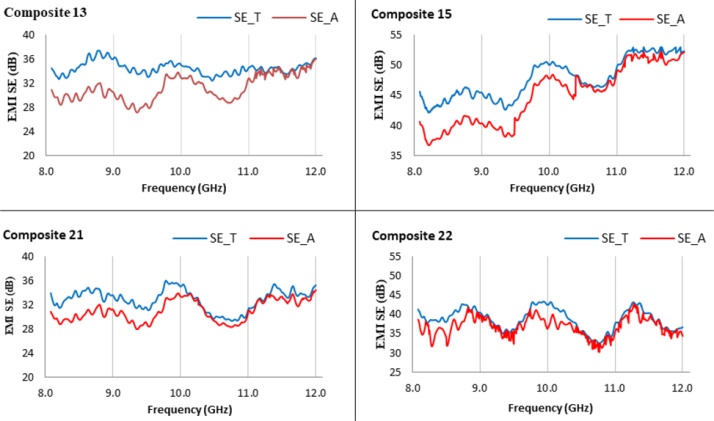


Fig. s2. The relationship between SET and SEA in the X-band


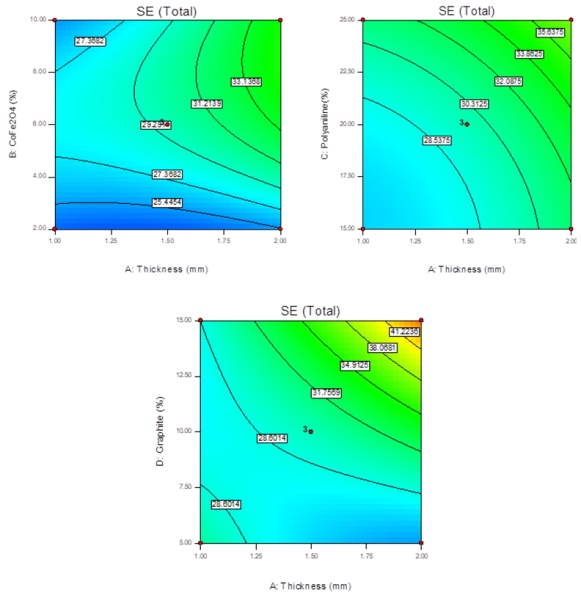


Fig s.3. Response surface plot of interacting effects of CF, PANI, and graphite on SET
